# Supplementary material for: Impact of the Kunming–Bangkok Highway on Land Use Changes along the Route between Laos and Thailand
Source: MDPI journal article supplement (doi:10.3390/land10090991), 2021-09-19
Supplement: s1 [file s1]

**Table S1.** Expansion/reduction in the intensity index from 2004 to 2013.

| 1. Type               | 2. 1 km       |               | 3. 2 km       |               | 4. 3 km       |               | 5. 4 km       |               | 6. 5 km       |               | 7. 6 km       |               | 8. 7 km       |               |
|-----------------------|---------------|---------------|---------------|---------------|---------------|---------------|---------------|---------------|---------------|---------------|---------------|---------------|---------------|---------------|
|                       | 2004–<br>2013 | 2013–<br>2018 |
| Forest                | (0.0886)      | (0.1520)      | (0.0826)      | (0.1484)      | (0.0779)      | (0.1421)      | (0.0755)      | (0.1367)      | (0.0742)      | (0.1354)      | (0.0732)      | (0.1331)      | (0.0736)      | (0.1345)      |
| Plantation            | 0.1134        | 0.2694        | 0.1083        | 0.2778        | 0.1051        | 0.2756        | 0.1027        | 0.2750        | 0.1000        | 0.2743        | 0.1013        | 0.2761        | 0.1043        | 0.2791        |
| Constructio<br>n land | 0.0153        | 0.0018        | 0.0146        | (0.0001)      | 0.0148        | 0.0002        | 0.0151        | 0.0004        | 0.0150        | 0.0000        | 0.0152        | (0.0012)      | 0.0152        | (0.0016)      |
| Agricultural<br>land  | (0.0428)      | (0.1378)      | (0.0429)      | (0.1472)      | (0.0453)      | (0.1543)      | (0.0455)      | (0.1605)      | (0.0441)      | (0.1611)      | (0.0465)      | (0.1641)      | (0.0489)      | (0.1654)      |
| Others                | 0.0028        | 0.0187        | 0.0027        | 0.0179        | 0.0034        | 0.0207        | 0.0032        | 0.0218        | 0.0033        | 0.0221        | 0.0031        | 0.0224        | 0.0030        | 0.0225        |
| Type                  | 8 km          |               | 9 km          |               | 10 km         |               | 15 km         |               | 20 km         |               | 25 km         |               | 30 km         |               |
|                       | 2004–<br>2013 | 2013–<br>2018 |
| Forest                | (0.0748)      | (0.1354)      | (0.0760)      | (0.1358)      | (0.0778)      | (0.1362)      | (0.0812)      | (0.1291)      | (0.0792)      | (0.0684)      | (0.0787)      | (0.1220)      | (0.0813)      | (0.1271)      |
| Plantation            | 0.1075        | 0.2818        | 0.1093        | 0.2851        | 0.1108        | 0.2845        | 0.1053        | 0.2670        | 0.0992        | 0.1353        | 0.0985        | 0.2311        | 0.1009        | 0.2325        |
| Constructio<br>n land | 0.0149        | (0.0011)      | 0.0147        | (0.0016)      | 0.0144        | (0.0012)      | 0.0134        | (0.0001)      | 0.0126        | 0.0003        | 0.0123        | 0.0011        | 0.0125        | 0.0011        |
| Agricultural<br>land  | (0.0512)      | (0.1690)      | (0.0520)      | (0.1723)      | (0.0514)      | (0.1724)      | (0.0434)      | (0.1672)      | (0.0418)      | (0.0864)      | (0.0447)      | (0.1504)      | (0.0465)      | (0.1503)      |
| Others                | 0.0036        | 0.0238        | 0.0040        | 0.0246        | 0.0041        | 0.0253        | 0.0061        | 0.0295        | 0.0097        | 0.0194        | 0.0130        | 0.0404        | 0.0150        | 0.0441        |

(The numbers in red signify negative values and those in black indicate positive values).

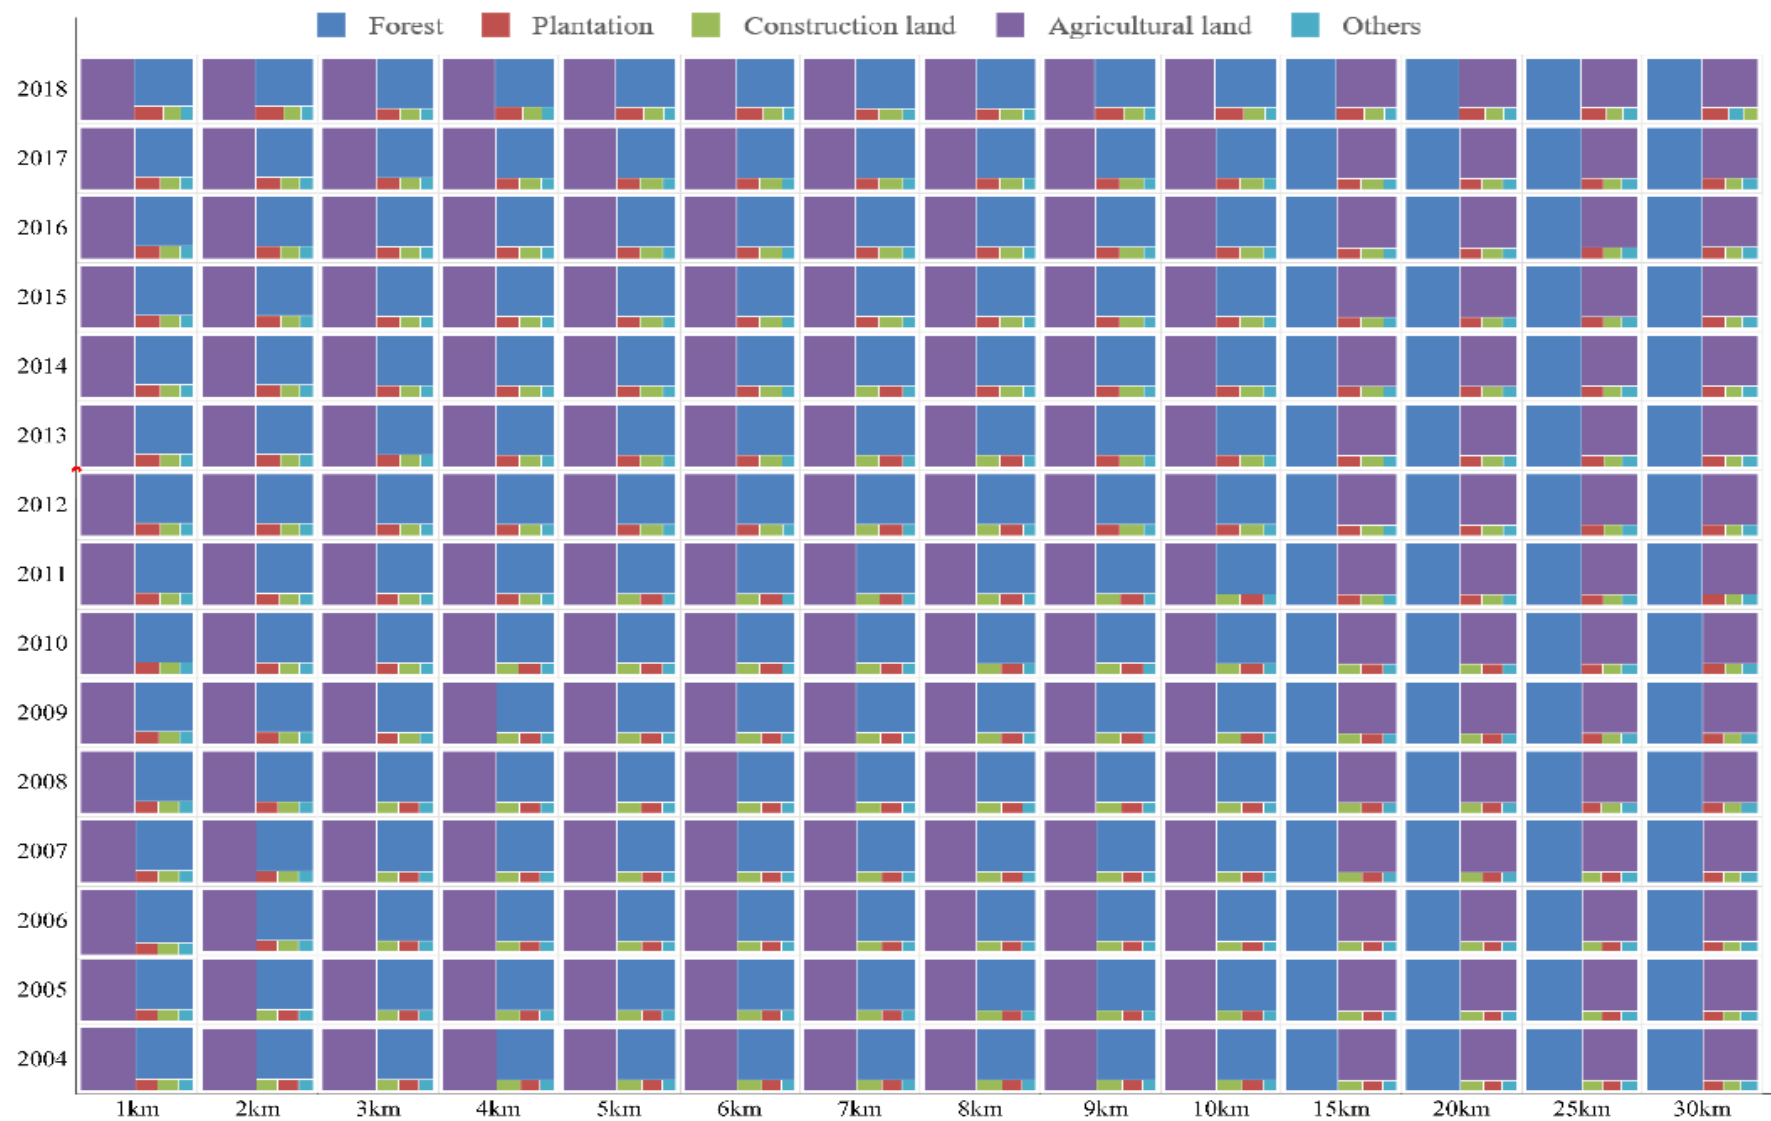

**Figure S1.** Major land use types and changes in the 30 km buffer areas of the Kunming–Bangkok Highway in 2004–2018.

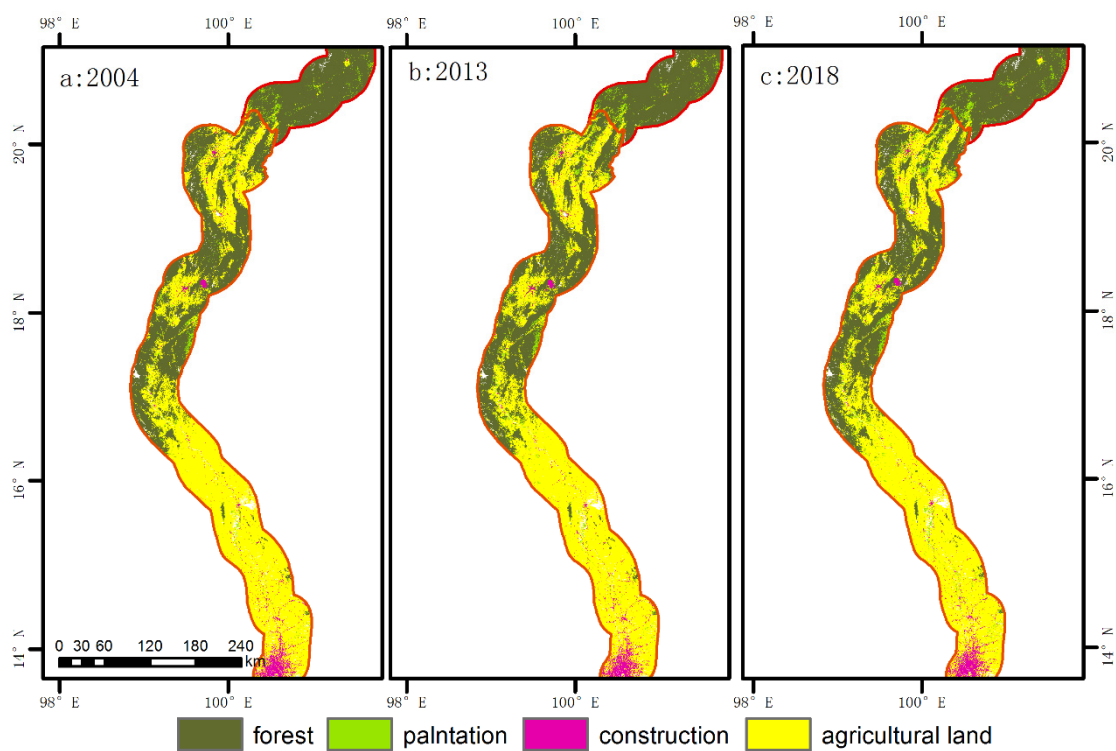

**Figure S2.** Major land use types in the 30 km buffer areas of the Kunming–Bangkok Highway in 2004, 2013, and 2018.
